# Supplementary material for: Thymol@activated Carbon Nanohybrid for Low-Density Polyeth-Ylene Based Active Packaging Films for Pork Fillets Shelf-Life Extension
Source: Preprints.org preprint supplement (doi:10.20944/preprints202306.0500.v1), 2023-06-07
Supplement: Supplementary file 3 [file supplementary]

| **LDPE/5TO@AC sample 1_average thickness 0.06mm** | | | **LDPE/5TO@AC sample 2_average thickness 0.06mm** | | | **LDPE/5TO@AC sample 3_average thickness 0.06mm** | | |
| --- | --- | --- | --- | --- | --- | --- | --- | --- |
| **t** | **mt/m0** | **1-mt/m0** | **t** | **mt/m0** | **1-mt/m0** | **t** | **mt/m0** | **1-mt/m0** |
| 0.00 | 1.00 | 0.00 | 0.00 | 1.00 | 0.00 | 0.00 | 1.00 | 0.00 |
| 60 | 0.98 | 0.02 | 60 | 0.98 | 0.02 | 60 | 0.98 | 0.02 |
| 120 | 0.98 | 0.02 | 120 | 0.98 | 0.02 | 120 | 0.98 | 0.02 |
| 180 | 0.98 | 0.02 | 180 | 0.98 | 0.02 | 180 | 0.98 | 0.02 |
| 240 | 0.98 | 0.02 | 240 | 0.98 | 0.02 | 240 | 0.98 | 0.02 |
| 300 | 0.98 | 0.02 | 300 | 0.98 | 0.02 | 300 | 0.98 | 0.02 |
| 360 | 0.98 | 0.02 | 360 | 0.98 | 0.02 | 360 | 0.98 | 0.02 |
| 420 | 0.98 | 0.02 | 420 | 0.98 | 0.02 | 420 | 0.98 | 0.02 |
| 480 | 0.98 | 0.02 | 480 | 0.98 | 0.02 | 480 | 0.98 | 0.02 |
| 540 | 0.98 | 0.02 | 540 | 0.98 | 0.02 | 540 | 0.98 | 0.02 |
| 600 | 0.98 | 0.02 | 600 | 0.98 | 0.02 | 600 | 0.98 | 0.02 |
| 660 | 0.98 | 0.02 | 660 | 0.98 | 0.02 | 660 | 0.98 | 0.02 |
| 720 | 0.98 | 0.02 | 720 | 0.98 | 0.02 | 720 | 0.98 | 0.02 |
| 780 | 0.98 | 0.02 | 780 | 0.98 | 0.02 | 780 | 0.98 | 0.02 |
| 840 | 0.98 | 0.02 | 840 | 0.98 | 0.02 | 840 | 0.98 | 0.02 |
| 900 | 0.97 | 0.03 | 900 | 0.98 | 0.02 | 900 | 0.98 | 0.02 |
| 960 | 0.97 | 0.03 | 960 | 0.98 | 0.02 | 960 | 0.98 | 0.02 |
| 1020 | 0.97 | 0.03 | 1020 | 0.98 | 0.02 | 1020 | 0.98 | 0.02 |
| 1080 | 0.97 | 0.03 | 1080 | 0.98 | 0.02 | 1080 | 0.98 | 0.02 |
| 1140 | 0.97 | 0.03 | 1140 | 0.98 | 0.02 | 1140 | 0.98 | 0.02 |
| 1200 | 0.97 | 0.03 | 1200 | 0.98 | 0.02 | 1200 | 0.98 | 0.02 |
| 1260 | 0.97 | 0.03 | 1260 | 0.98 | 0.02 | 1260 | 0.98 | 0.02 |
| 1320 | 0.97 | 0.03 | 1320 | 0.98 | 0.02 | 1320 | 0.98 | 0.02 |
| 1380 | 0.97 | 0.03 | 1380 | 0.98 | 0.02 | 1380 | 0.98 | 0.02 |
| 1440 | 0.97 | 0.03 | 1440 | 0.98 | 0.02 | 1440 | 0.98 | 0.02 |

**Table S1.** Data from thermogravimetric experiments used control release experiments of thymol from LDPE/5TO@AC film sample

**Table S2.** Data from thermogravimetric experiments used for control release experiments of thymol from LDPE/10TO@AC film sample.

| **LDPE/10TO@AC sample 1_average thickness 0.08mm** | | | **LDPE/10TO@AC sample 2_average thickness 0.07mm** | | | **LDPE/10TO@AC sample 3_average thickness 0.06mm** | | |
| --- | --- | --- | --- | --- | --- | --- | --- | --- |
| **t** | **mt/m0** | **1-mt/m0** | **t** | **mt/m0** | **1-mt/m0** | **t** | **mt/m0** | **1-mt/m0** |
| 0.00 | 1.00 | 0.00 | 0.00 | 1.00 | 0.00 | 0.00 | 1.00 | 0.00 |
| 60 | 0.98 | 0.02 | 60 | 0.98 | 0.02 | 60 | 0.97 | 0.03 |
| 120 | 0.97 | 0.03 | 120 | 0.98 | 0.02 | 120 | 0.96 | 0.04 |
| 180 | 0.97 | 0.03 | 180 | 0.98 | 0.02 | 180 | 0.96 | 0.04 |
| 240 | 0.97 | 0.03 | 240 | 0.98 | 0.02 | 240 | 0.96 | 0.04 |
| 300 | 0.97 | 0.03 | 300 | 0.98 | 0.02 | 300 | 0.96 | 0.04 |
| 360 | 0.97 | 0.03 | 360 | 0.98 | 0.02 | 360 | 0.96 | 0.04 |
| 420 | 0.97 | 0.03 | 420 | 0.97 | 0.03 | 420 | 0.96 | 0.04 |
| 480 | 0.97 | 0.03 | 480 | 0.97 | 0.03 | 480 | 0.96 | 0.04 |
| 540 | 0.97 | 0.03 | 540 | 0.97 | 0.03 | 540 | 0.96 | 0.04 |
| 600 | 0.97 | 0.03 | 600 | 0.97 | 0.03 | 600 | 0.96 | 0.04 |
| 660 | 0.97 | 0.03 | 660 | 0.97 | 0.03 | 660 | 0.96 | 0.04 |
| 720 | 0.97 | 0.03 | 720 | 0.97 | 0.03 | 720 | 0.96 | 0.04 |
| 780 | 0.97 | 0.03 | 780 | 0.97 | 0.03 | 780 | 0.96 | 0.04 |
| 840 | 0.97 | 0.03 | 840 | 0.97 | 0.03 | 840 | 0.96 | 0.04 |
| 900 | 0.97 | 0.03 | 900 | 0.97 | 0.03 | 900 | 0.96 | 0.04 |
| 960 | 0.97 | 0.03 | 960 | 0.97 | 0.03 | 960 | 0.96 | 0.04 |
| 1020 | 0.97 | 0.03 | 1020 | 0.97 | 0.03 | 1020 | 0.96 | 0.04 |
| 1080 | 0.97 | 0.03 | 1080 | 0.97 | 0.03 | 1080 | 0.96 | 0.04 |
| 1140 | 0.97 | 0.03 | 1140 | 0.97 | 0.03 | 1140 | 0.96 | 0.04 |
| 1200 | 0.97 | 0.03 | 1200 | 0.97 | 0.03 | 1200 | 0.96 | 0.04 |
| 1260 | 0.97 | 0.03 | 1260 | 0.97 | 0.03 | 1260 | 0.96 | 0.04 |
| 1320 | 0.97 | 0.03 | 1320 | 0.00 | 1.00 | 1320 | 0.96 | 0.04 |
| 1380 | 0.97 | 0.03 | 1380 | 0.00 | 1.00 | 1380 | 0.96 | 0.04 |
| 1440 | 0.00 | 1.00 | 1440 | 0.00 | 1.00 | 1440 | 0.96 | 0.04 |

**Table S3.** Data from thermogravimetric experiments used for control release experiments of thymol from LDPE/15TO@AC film sample.

| **LDPE/15TO@AC sample 1_average thickness 0.10mm** | | | **LDPE/15TO@AC sample 2_average thickness 0.09mm** | | | **LDPE/15TO@AC sample 3_average thickness 0.05mm** | | |
| --- | --- | --- | --- | --- | --- | --- | --- | --- |
| **t** | **mt/m0** | **1-mt/m0** | **t** | **mt/m0** | **1-mt/m0** | **t** | **mt/m0** | **1-mt/m0** |
| 0.00 | 1.00 | 0.00 | 0.00 | 1.00 | 0.00 | 0.00 | 1.00 | 0.00 |
| 60 | 0.96 | 0.04 | 60 | 0.96 | 0.04 | 60 | 0.97 | 0.03 |
| 120 | 0.96 | 0.04 | 120 | 0.96 | 0.04 | 120 | 0.97 | 0.03 |
| 180 | 0.96 | 0.04 | 180 | 0.96 | 0.04 | 180 | 0.97 | 0.03 |
| 240 | 0.96 | 0.04 | 240 | 0.96 | 0.04 | 240 | 0.97 | 0.03 |
| 300 | 0.95 | 0.05 | 300 | 0.96 | 0.04 | 300 | 0.97 | 0.03 |
| 360 | 0.95 | 0.05 | 360 | 0.96 | 0.04 | 360 | 0.97 | 0.03 |
| 420 | 0.95 | 0.05 | 420 | 0.96 | 0.04 | 420 | 0.97 | 0.03 |
| 480 | 0.95 | 0.05 | 480 | 0.96 | 0.04 | 480 | 0.97 | 0.03 |
| 540 | 0.95 | 0.05 | 540 | 0.96 | 0.04 | 540 | 0.97 | 0.03 |
| 600 | 0.95 | 0.05 | 600 | 0.96 | 0.04 | 600 | 0.97 | 0.03 |
| 660 | 0.95 | 0.05 | 660 | 0.96 | 0.04 | 660 | 0.97 | 0.03 |
| 720 | 0.95 | 0.05 | 720 | 0.96 | 0.04 | 720 | 0.97 | 0.03 |
| 780 | 0.95 | 0.05 | 780 | 0.96 | 0.04 | 780 | 0.97 | 0.03 |
| 840 | 0.95 | 0.05 | 840 | 0.96 | 0.04 | 840 | 0.97 | 0.03 |
| 900 | 0.95 | 0.05 | 900 | 0.96 | 0.04 | 900 | 0.97 | 0.03 |
| 960 | 0.95 | 0.05 | 960 | 0.96 | 0.04 | 960 | 0.97 | 0.03 |
| 1020 | 0.95 | 0.05 | 1020 | 0.96 | 0.04 | 1020 | 0.97 | 0.03 |
| 1080 | 0.95 | 0.05 | 1080 | 0.96 | 0.04 | 1080 | 0.97 | 0.03 |
| 1140 | 0.95 | 0.05 | 1140 | 0.96 | 0.04 | 1140 | 0.97 | 0.03 |
| 1200 | 0.95 | 0.05 | 1200 | 0.96 | 0.04 | 1200 | 0.97 | 0.03 |
| 1260 | 0.95 | 0.05 | 1260 | 0.96 | 0.04 | 1260 | 0.97 | 0.03 |
| 1320 | 0.95 | 0.05 | 1320 | 0.96 | 0.04 | 1320 | 0.97 | 0.03 |
| 1380 | 0.95 | 0.05 | 1380 | 0.96 | 0.04 | 1380 | 0.97 | 0.03 |
| 1440 | 0.94 | 0.06 | 1440 | 0.96 | 0.04 | 1440 | 0.97 | 0.03 |
| 1500 | 0.94 | 0.06 | 1500 | 0.00 | 1.00 | 1500 | 0.96 | 0.04 |
| 1560 | 0.94 | 0.06 | 1560 | 0.00 | 1.00 | 1560 | 0.96 | 0.04 |
| 1620 | 0.94 | 0.06 | 1620 | 0.00 | 1.00 | 1620 | 0.96 | 0.04 |
| 1680 | 0.94 | 0.06 | 1680 | 0.00 | 1.00 | 1680 | 0.96 | 0.04 |
| 1740 | 0.94 | 0.06 | 1740 | 0.00 | 1.00 | 1740 | 0.96 | 0.04 |
| 1800 | 0.94 | 0.06 | 1800 | 0.00 | 1.00 | 1800 | 0.96 | 0.04 |

**Table S4.** Multiple comparison tests of TBARS values of pork meat during storage with respect to packaging treatments

| **Multiple Comparisons** | | | | | | | | |
| --- | --- | --- | --- | --- | --- | --- | --- | --- |
| Dependent Variable | | (I) TR | (J) TR | Mean Difference (I-J) | Std. Error | Sig. | 95% Confidence Interval | |
| Lower Bound | Upper Bound |
| DAY0 | Tukey HSD | 1,00 | 2,00 | ,22880* | ,00562 | ,000 | ,2116 | ,2460 |
| 3,00 | ,22880* | ,00562 | ,000 | ,2116 | ,2460 |
| 2,00 | 1,00 | -,22880* | ,00562 | ,000 | -,2460 | -,2116 |
| 3,00 | ,00000 | ,00562 | 1,000 | -,0172 | ,0172 |
| 3,00 | 1,00 | -,22880* | ,00562 | ,000 | -,2460 | -,2116 |
| 2,00 | ,00000 | ,00562 | 1,000 | -,0172 | ,0172 |
| LSD | 1,00 | 2,00 | ,22880* | ,00562 | ,000 | ,2151 | ,2425 |
| 3,00 | ,22880* | ,00562 | ,000 | ,2151 | ,2425 |
| 2,00 | 1,00 | -,22880* | ,00562 | ,000 | -,2425 | -,2151 |
| 3,00 | ,00000 | ,00562 | 1,000 | -,0137 | ,0137 |
| 3,00 | 1,00 | -,22880* | ,00562 | ,000 | -,2425 | -,2151 |
| 2,00 | ,00000 | ,00562 | 1,000 | -,0137 | ,0137 |
| Bonferroni | 1,00 | 2,00 | ,22880* | ,00562 | ,000 | ,2103 | ,2473 |
| 3,00 | ,22880* | ,00562 | ,000 | ,2103 | ,2473 |
| 2,00 | 1,00 | -,22880* | ,00562 | ,000 | -,2473 | -,2103 |
| 3,00 | ,00000 | ,00562 | 1,000 | -,0185 | ,0185 |
| 3,00 | 1,00 | -,22880* | ,00562 | ,000 | -,2473 | -,2103 |
| 2,00 | ,00000 | ,00562 | 1,000 | -,0185 | ,0185 |
| DAY2 | Tukey HSD | 1,00 | 2,00 | ,04420* | ,01082 | ,015 | ,0110 | ,0774 |
| 3,00 | ,09620* | ,01082 | ,000 | ,0630 | ,1294 |
| 2,00 | 1,00 | -,04420* | ,01082 | ,015 | -,0774 | -,0110 |
| 3,00 | ,05200* | ,01082 | ,007 | ,0188 | ,0852 |
| 3,00 | 1,00 | -,09620* | ,01082 | ,000 | -,1294 | -,0630 |
| 2,00 | -,05200* | ,01082 | ,007 | -,0852 | -,0188 |
| LSD | 1,00 | 2,00 | ,04420* | ,01082 | ,006 | ,0177 | ,0707 |
| 3,00 | ,09620* | ,01082 | ,000 | ,0697 | ,1227 |
| 2,00 | 1,00 | -,04420* | ,01082 | ,006 | -,0707 | -,0177 |
| 3,00 | ,05200* | ,01082 | ,003 | ,0255 | ,0785 |
| 3,00 | 1,00 | -,09620* | ,01082 | ,000 | -,1227 | -,0697 |
| 2,00 | -,05200* | ,01082 | ,003 | -,0785 | -,0255 |
| Bonferroni | 1,00 | 2,00 | ,04420* | ,01082 | ,019 | ,0086 | ,0798 |
| 3,00 | ,09620* | ,01082 | ,000 | ,0606 | ,1318 |
| 2,00 | 1,00 | -,04420* | ,01082 | ,019 | -,0798 | -,0086 |
| 3,00 | ,05200* | ,01082 | ,009 | ,0164 | ,0876 |
| 3,00 | 1,00 | -,09620* | ,01082 | ,000 | -,1318 | -,0606 |
| 2,00 | -,05200* | ,01082 | ,009 | -,0876 | -,0164 |
| DAY4 | Tukey HSD | 1,00 | 2,00 | ,05460* | ,01163 | ,008 | ,0189 | ,0903 |
| 3,00 | ,13000* | ,01163 | ,000 | ,0943 | ,1657 |
| 2,00 | 1,00 | -,05460* | ,01163 | ,008 | -,0903 | -,0189 |
| 3,00 | ,07540* | ,01163 | ,002 | ,0397 | ,1111 |
| 3,00 | 1,00 | -,13000* | ,01163 | ,000 | -,1657 | -,0943 |
| 2,00 | -,07540* | ,01163 | ,002 | -,1111 | -,0397 |
| LSD | 1,00 | 2,00 | ,05460* | ,01163 | ,003 | ,0261 | ,0831 |
| 3,00 | ,13000* | ,01163 | ,000 | ,1015 | ,1585 |
| 2,00 | 1,00 | -,05460* | ,01163 | ,003 | -,0831 | -,0261 |
| 3,00 | ,07540* | ,01163 | ,001 | ,0469 | ,1039 |
| 3,00 | 1,00 | -,13000* | ,01163 | ,000 | -,1585 | -,1015 |
| 2,00 | -,07540* | ,01163 | ,001 | -,1039 | -,0469 |
| Bonferroni | 1,00 | 2,00 | ,05460* | ,01163 | ,010 | ,0164 | ,0928 |
| 3,00 | ,13000* | ,01163 | ,000 | ,0918 | ,1682 |
| 2,00 | 1,00 | -,05460* | ,01163 | ,010 | -,0928 | -,0164 |
| 3,00 | ,07540* | ,01163 | ,002 | ,0372 | ,1136 |
| 3,00 | 1,00 | -,13000* | ,01163 | ,000 | -,1682 | -,0918 |
| 2,00 | -,07540* | ,01163 | ,002 | -,1136 | -,0372 |
| DAY6 | Tukey HSD | 1,00 | 2,00 | ,10140* | ,01516 | ,001 | ,0549 | ,1479 |
| 3,00 | ,19500* | ,01516 | ,000 | ,1485 | ,2415 |
| 2,00 | 1,00 | -,10140* | ,01516 | ,001 | -,1479 | -,0549 |
| 3,00 | ,09360* | ,01516 | ,002 | ,0471 | ,1401 |
| 3,00 | 1,00 | -,19500* | ,01516 | ,000 | -,2415 | -,1485 |
| 2,00 | -,09360* | ,01516 | ,002 | -,1401 | -,0471 |
| LSD | 1,00 | 2,00 | ,10140* | ,01516 | ,001 | ,0643 | ,1385 |
| 3,00 | ,19500* | ,01516 | ,000 | ,1579 | ,2321 |
| 2,00 | 1,00 | -,10140* | ,01516 | ,001 | -,1385 | -,0643 |
| 3,00 | ,09360* | ,01516 | ,001 | ,0565 | ,1307 |
| 3,00 | 1,00 | -,19500* | ,01516 | ,000 | -,2321 | -,1579 |
| 2,00 | -,09360* | ,01516 | ,001 | -,1307 | -,0565 |
| Bonferroni | 1,00 | 2,00 | ,10140* | ,01516 | ,002 | ,0516 | ,1512 |
| 3,00 | ,19500* | ,01516 | ,000 | ,1452 | ,2448 |
| 2,00 | 1,00 | -,10140* | ,01516 | ,002 | -,1512 | -,0516 |
| 3,00 | ,09360* | ,01516 | ,002 | ,0438 | ,1434 |
| 3,00 | 1,00 | -,19500* | ,01516 | ,000 | -,2448 | -,1452 |
| 2,00 | -,09360* | ,01516 | ,002 | -,1434 | -,0438 |
| DAY8 | Tukey HSD | 1,00 | 2,00 | ,15340* | ,01712 | ,000 | ,1009 | ,2059 |
| 3,00 | ,22620* | ,01712 | ,000 | ,1737 | ,2787 |
| 2,00 | 1,00 | -,15340* | ,01712 | ,000 | -,2059 | -,1009 |
| 3,00 | ,07280* | ,01712 | ,013 | ,0203 | ,1253 |
| 3,00 | 1,00 | -,22620* | ,01712 | ,000 | -,2787 | -,1737 |
| 2,00 | -,07280* | ,01712 | ,013 | -,1253 | -,0203 |
| LSD | 1,00 | 2,00 | ,15340* | ,01712 | ,000 | ,1115 | ,1953 |
| 3,00 | ,22620* | ,01712 | ,000 | ,1843 | ,2681 |
| 2,00 | 1,00 | -,15340* | ,01712 | ,000 | -,1953 | -,1115 |
| 3,00 | ,07280* | ,01712 | ,005 | ,0309 | ,1147 |
| 3,00 | 1,00 | -,22620* | ,01712 | ,000 | -,2681 | -,1843 |
| 2,00 | -,07280* | ,01712 | ,005 | -,1147 | -,0309 |
| Bonferroni | 1,00 | 2,00 | ,15340* | ,01712 | ,000 | ,0971 | ,2097 |
| 3,00 | ,22620* | ,01712 | ,000 | ,1699 | ,2825 |
| 2,00 | 1,00 | -,15340* | ,01712 | ,000 | -,2097 | -,0971 |
| 3,00 | ,07280* | ,01712 | ,016 | ,0165 | ,1291 |
| 3,00 | 1,00 | -,22620* | ,01712 | ,000 | -,2825 | -,1699 |
| 2,00 | -,07280* | ,01712 | ,016 | -,1291 | -,0165 |
| DAY10 | Tukey HSD | 1,00 | 2,00 | ,11440* | ,02316 | ,006 | ,0433 | ,1855 |
| 3,00 | ,26780* | ,02316 | ,000 | ,1967 | ,3389 |
| 2,00 | 1,00 | -,11440* | ,02316 | ,006 | -,1855 | -,0433 |
| 3,00 | ,15340* | ,02316 | ,001 | ,0823 | ,2245 |
| 3,00 | 1,00 | -,26780* | ,02316 | ,000 | -,3389 | -,1967 |
| 2,00 | -,15340* | ,02316 | ,001 | -,2245 | -,0823 |
| LSD | 1,00 | 2,00 | ,11440* | ,02316 | ,003 | ,0577 | ,1711 |
| 3,00 | ,26780* | ,02316 | ,000 | ,2111 | ,3245 |
| 2,00 | 1,00 | -,11440* | ,02316 | ,003 | -,1711 | -,0577 |
| 3,00 | ,15340* | ,02316 | ,001 | ,0967 | ,2101 |
| 3,00 | 1,00 | -,26780* | ,02316 | ,000 | -,3245 | -,2111 |
| 2,00 | -,15340* | ,02316 | ,001 | -,2101 | -,0967 |
| Bonferroni | 1,00 | 2,00 | ,11440* | ,02316 | ,008 | ,0383 | ,1905 |
| 3,00 | ,26780* | ,02316 | ,000 | ,1917 | ,3439 |
| 2,00 | 1,00 | -,11440* | ,02316 | ,008 | -,1905 | -,0383 |
| 3,00 | ,15340* | ,02316 | ,002 | ,0773 | ,2295 |
| 3,00 | 1,00 | -,26780* | ,02316 | ,000 | -,3439 | -,1917 |
| 2,00 | -,15340* | ,02316 | ,002 | -,2295 | -,0773 |
| DAY12 | Tukey HSD | 1,00 | 2,00 | ,08060* | ,01309 | ,002 | ,0404 | ,1208 |
| 3,00 | ,22360* | ,01309 | ,000 | ,1834 | ,2638 |
| 2,00 | 1,00 | -,08060* | ,01309 | ,002 | -,1208 | -,0404 |
| 3,00 | ,14300* | ,01309 | ,000 | ,1028 | ,1832 |
| 3,00 | 1,00 | -,22360* | ,01309 | ,000 | -,2638 | -,1834 |
| 2,00 | -,14300* | ,01309 | ,000 | -,1832 | -,1028 |
| LSD | 1,00 | 2,00 | ,08060* | ,01309 | ,001 | ,0486 | ,1126 |
| 3,00 | ,22360* | ,01309 | ,000 | ,1916 | ,2556 |
| 2,00 | 1,00 | -,08060* | ,01309 | ,001 | -,1126 | -,0486 |
| 3,00 | ,14300* | ,01309 | ,000 | ,1110 | ,1750 |
| 3,00 | 1,00 | -,22360* | ,01309 | ,000 | -,2556 | -,1916 |
| 2,00 | -,14300* | ,01309 | ,000 | -,1750 | -,1110 |
| Bonferroni | 1,00 | 2,00 | ,08060* | ,01309 | ,003 | ,0376 | ,1236 |
| 3,00 | ,22360* | ,01309 | ,000 | ,1806 | ,2666 |
| 2,00 | 1,00 | -,08060* | ,01309 | ,003 | -,1236 | -,0376 |
| 3,00 | ,14300* | ,01309 | ,000 | ,1000 | ,1860 |
| 3,00 | 1,00 | -,22360* | ,01309 | ,000 | -,2666 | -,1806 |
| 2,00 | -,14300* | ,01309 | ,000 | -,1860 | -,1000 |
| *. The mean difference is significant at the 0.05 level. TR: Packaging treatment, 1:LDPE, 2:LDPE-AC, 3:LDPE-AC-TO  **Table S5.** Multiple comparison tests of heme iron values of pork meat during storage with respect to packaging treatment | | | | | | | | |

| **Multiple Comparisons** | | | | | | | | |
| --- | --- | --- | --- | --- | --- | --- | --- | --- |
| Dependent Variable | | (I) TR | (J) TR | Mean Difference (I-J) | Std. Error | Sig. | 95% Confidence Interval | |
| Lower Bound | Upper Bound |
| DAY0 | Tukey HSD | 1,00 | 2,00 | 10,17593* | ,05885 | ,000 | 9,9953 | 10,3565 |
| 3,00 | 10,17593* | ,05885 | ,000 | 9,9953 | 10,3565 |
| 2,00 | 1,00 | -10,17593* | ,05885 | ,000 | -10,3565 | -9,9953 |
| 3,00 | ,00000 | ,05885 | 1,000 | -,1806 | ,1806 |
| 3,00 | 1,00 | -10,17593* | ,05885 | ,000 | -10,3565 | -9,9953 |
| 2,00 | ,00000 | ,05885 | 1,000 | -,1806 | ,1806 |
| LSD | 1,00 | 2,00 | 10,17593* | ,05885 | ,000 | 10,0319 | 10,3199 |
| 3,00 | 10,17593* | ,05885 | ,000 | 10,0319 | 10,3199 |
| 2,00 | 1,00 | -10,17593* | ,05885 | ,000 | -10,3199 | -10,0319 |
| 3,00 | ,00000 | ,05885 | 1,000 | -,1440 | ,1440 |
| 3,00 | 1,00 | -10,17593* | ,05885 | ,000 | -10,3199 | -10,0319 |
| 2,00 | ,00000 | ,05885 | 1,000 | -,1440 | ,1440 |
| Bonferroni | 1,00 | 2,00 | 10,17593* | ,05885 | ,000 | 9,9824 | 10,3694 |
| 3,00 | 10,17593* | ,05885 | ,000 | 9,9824 | 10,3694 |
| 2,00 | 1,00 | -10,17593* | ,05885 | ,000 | -10,3694 | -9,9824 |
| 3,00 | ,00000 | ,05885 | 1,000 | -,1935 | ,1935 |
| 3,00 | 1,00 | -10,17593* | ,05885 | ,000 | -10,3694 | -9,9824 |
| 2,00 | ,00000 | ,05885 | 1,000 | -,1935 | ,1935 |
| DAY2 | Tukey HSD | 1,00 | 2,00 | -,95962* | ,09234 | ,000 | -1,2429 | -,6763 |
| 3,00 | -1,65934* | ,09234 | ,000 | -1,9427 | -1,3760 |
| 2,00 | 1,00 | ,95962* | ,09234 | ,000 | ,6763 | 1,2429 |
| 3,00 | -,69972* | ,09234 | ,001 | -,9830 | -,4164 |
| 3,00 | 1,00 | 1,65934* | ,09234 | ,000 | 1,3760 | 1,9427 |
| 2,00 | ,69972* | ,09234 | ,001 | ,4164 | ,9830 |
| LSD | 1,00 | 2,00 | -,95962* | ,09234 | ,000 | -1,1856 | -,7337 |
| 3,00 | -1,65934* | ,09234 | ,000 | -1,8853 | -1,4334 |
| 2,00 | 1,00 | ,95962* | ,09234 | ,000 | ,7337 | 1,1856 |
| 3,00 | -,69972* | ,09234 | ,000 | -,9257 | -,4738 |
| 3,00 | 1,00 | 1,65934* | ,09234 | ,000 | 1,4334 | 1,8853 |
| 2,00 | ,69972* | ,09234 | ,000 | ,4738 | ,9257 |
| Bonferroni | 1,00 | 2,00 | -,95962* | ,09234 | ,000 | -1,2632 | -,6561 |
| 3,00 | -1,65934* | ,09234 | ,000 | -1,9629 | -1,3558 |
| 2,00 | 1,00 | ,95962* | ,09234 | ,000 | ,6561 | 1,2632 |
| 3,00 | -,69972* | ,09234 | ,001 | -1,0033 | -,3962 |
| 3,00 | 1,00 | 1,65934* | ,09234 | ,000 | 1,3558 | 1,9629 |
| 2,00 | ,69972* | ,09234 | ,001 | ,3962 | 1,0033 |
| DAY4 | Tukey HSD | 1,00 | 2,00 | -,63974* | ,09234 | ,001 | -,9231 | -,3564 |
| 3,00 | -1,75930* | ,09234 | ,000 | -2,0426 | -1,4760 |
| 2,00 | 1,00 | ,63974* | ,09234 | ,001 | ,3564 | ,9231 |
| 3,00 | -1,11955* | ,09234 | ,000 | -1,4029 | -,8362 |
| 3,00 | 1,00 | 1,75930* | ,09234 | ,000 | 1,4760 | 2,0426 |
| 2,00 | 1,11955* | ,09234 | ,000 | ,8362 | 1,4029 |
| LSD | 1,00 | 2,00 | -,63974* | ,09234 | ,000 | -,8657 | -,4138 |
| 3,00 | -1,75930* | ,09234 | ,000 | -1,9852 | -1,5334 |
| 2,00 | 1,00 | ,63974* | ,09234 | ,000 | ,4138 | ,8657 |
| 3,00 | -1,11955* | ,09234 | ,000 | -1,3455 | -,8936 |
| 3,00 | 1,00 | 1,75930* | ,09234 | ,000 | 1,5334 | 1,9852 |
| 2,00 | 1,11955* | ,09234 | ,000 | ,8936 | 1,3455 |
| Bonferroni | 1,00 | 2,00 | -,63974* | ,09234 | ,001 | -,9433 | -,3362 |
| 3,00 | -1,75930* | ,09234 | ,000 | -2,0629 | -1,4557 |
| 2,00 | 1,00 | ,63974* | ,09234 | ,001 | ,3362 | ,9433 |
| 3,00 | -1,11955* | ,09234 | ,000 | -1,4231 | -,8160 |
| 3,00 | 1,00 | 1,75930* | ,09234 | ,000 | 1,4557 | 2,0629 |
| 2,00 | 1,11955* | ,09234 | ,000 | ,8160 | 1,4231 |
| DAY6 | Tukey HSD | 1,00 | 2,00 | -,59976* | ,16727 | ,027 | -1,1130 | -,0865 |
| 3,00 | -2,27909* | ,16727 | ,000 | -2,7923 | -1,7659 |
| 2,00 | 1,00 | ,59976* | ,16727 | ,027 | ,0865 | 1,1130 |
| 3,00 | -1,67933* | ,16727 | ,000 | -2,1925 | -1,1661 |
| 3,00 | 1,00 | 2,27909* | ,16727 | ,000 | 1,7659 | 2,7923 |
| 2,00 | 1,67933* | ,16727 | ,000 | 1,1661 | 2,1925 |
| LSD | 1,00 | 2,00 | -,59976* | ,16727 | ,012 | -1,0090 | -,1905 |
| 3,00 | -2,27909* | ,16727 | ,000 | -2,6884 | -1,8698 |
| 2,00 | 1,00 | ,59976* | ,16727 | ,012 | ,1905 | 1,0090 |
| 3,00 | -1,67933* | ,16727 | ,000 | -2,0886 | -1,2700 |
| 3,00 | 1,00 | 2,27909* | ,16727 | ,000 | 1,8698 | 2,6884 |
| 2,00 | 1,67933* | ,16727 | ,000 | 1,2700 | 2,0886 |
| Bonferroni | 1,00 | 2,00 | -,59976* | ,16727 | ,035 | -1,1496 | -,0499 |
| 3,00 | -2,27909* | ,16727 | ,000 | -2,8290 | -1,7292 |
| 2,00 | 1,00 | ,59976* | ,16727 | ,035 | ,0499 | 1,1496 |
| 3,00 | -1,67933* | ,16727 | ,000 | -2,2292 | -1,1295 |
| 3,00 | 1,00 | 2,27909* | ,16727 | ,000 | 1,7292 | 2,8290 |
| 2,00 | 1,67933* | ,16727 | ,000 | 1,1295 | 2,2292 |
| DAY8 | Tukey HSD | 1,00 | 2,00 | -,59976* | ,13559 | ,011 | -1,0158 | -,1837 |
| 3,00 | -2,15914* | ,13559 | ,000 | -2,5752 | -1,7431 |
| 2,00 | 1,00 | ,59976* | ,13559 | ,011 | ,1837 | 1,0158 |
| 3,00 | -1,55938* | ,13559 | ,000 | -1,9754 | -1,1433 |
| 3,00 | 1,00 | 2,15914* | ,13559 | ,000 | 1,7431 | 2,5752 |
| 2,00 | 1,55938* | ,13559 | ,000 | 1,1433 | 1,9754 |
| LSD | 1,00 | 2,00 | -,59976* | ,13559 | ,004 | -,9315 | -,2680 |
| 3,00 | -2,15914* | ,13559 | ,000 | -2,4909 | -1,8274 |
| 2,00 | 1,00 | ,59976* | ,13559 | ,004 | ,2680 | ,9315 |
| 3,00 | -1,55938* | ,13559 | ,000 | -1,8912 | -1,2276 |
| 3,00 | 1,00 | 2,15914* | ,13559 | ,000 | 1,8274 | 2,4909 |
| 2,00 | 1,55938* | ,13559 | ,000 | 1,2276 | 1,8912 |
| Bonferroni | 1,00 | 2,00 | -,59976* | ,13559 | ,013 | -1,0455 | -,1540 |
| 3,00 | -2,15914* | ,13559 | ,000 | -2,6049 | -1,7134 |
| 2,00 | 1,00 | ,59976* | ,13559 | ,013 | ,1540 | 1,0455 |
| 3,00 | -1,55938* | ,13559 | ,000 | -2,0051 | -1,1136 |
| 3,00 | 1,00 | 2,15914* | ,13559 | ,000 | 1,7134 | 2,6049 |
| 2,00 | 1,55938* | ,13559 | ,000 | 1,1136 | 2,0051 |
| DAY10 | Tukey HSD | 1,00 | 2,00 | -,25990 | ,17042 | ,345 | -,7828 | ,2630 |
| 3,00 | -1,61935* | ,17042 | ,000 | -2,1423 | -1,0965 |
| 2,00 | 1,00 | ,25990 | ,17042 | ,345 | -,2630 | ,7828 |
| 3,00 | -1,35946* | ,17042 | ,001 | -1,8824 | -,8366 |
| 3,00 | 1,00 | 1,61935* | ,17042 | ,000 | 1,0965 | 2,1423 |
| 2,00 | 1,35946* | ,17042 | ,001 | ,8366 | 1,8824 |
| LSD | 1,00 | 2,00 | -,25990 | ,17042 | ,178 | -,6769 | ,1571 |
| 3,00 | -1,61935* | ,17042 | ,000 | -2,0364 | -1,2023 |
| 2,00 | 1,00 | ,25990 | ,17042 | ,178 | -,1571 | ,6769 |
| 3,00 | -1,35946* | ,17042 | ,000 | -1,7765 | -,9425 |
| 3,00 | 1,00 | 1,61935* | ,17042 | ,000 | 1,2023 | 2,0364 |
| 2,00 | 1,35946* | ,17042 | ,000 | ,9425 | 1,7765 |
| Bonferroni | 1,00 | 2,00 | -,25990 | ,17042 | ,534 | -,8201 | ,3004 |
| 3,00 | -1,61935* | ,17042 | ,000 | -2,1796 | -1,0591 |
| 2,00 | 1,00 | ,25990 | ,17042 | ,534 | -,3004 | ,8201 |
| 3,00 | -1,35946* | ,17042 | ,001 | -1,9197 | -,7992 |
| 3,00 | 1,00 | 1,61935* | ,17042 | ,000 | 1,0591 | 2,1796 |
| 2,00 | 1,35946* | ,17042 | ,001 | ,7992 | 1,9197 |
| DAY12 | Tukey HSD | 1,00 | 2,00 | -,53978* | ,10950 | ,006 | -,8758 | -,2038 |
| 3,00 | -1,19952* | ,10950 | ,000 | -1,5355 | -,8635 |
| 2,00 | 1,00 | ,53978* | ,10950 | ,006 | ,2038 | ,8758 |
| 3,00 | -,65974* | ,10950 | ,002 | -,9957 | -,3238 |
| 3,00 | 1,00 | 1,19952* | ,10950 | ,000 | ,8635 | 1,5355 |
| 2,00 | ,65974* | ,10950 | ,002 | ,3238 | ,9957 |
| LSD | 1,00 | 2,00 | -,53978* | ,10950 | ,003 | -,8077 | -,2718 |
| 3,00 | -1,19952* | ,10950 | ,000 | -1,4675 | -,9316 |
| 2,00 | 1,00 | ,53978* | ,10950 | ,003 | ,2718 | ,8077 |
| 3,00 | -,65974* | ,10950 | ,001 | -,9277 | -,3918 |
| 3,00 | 1,00 | 1,19952* | ,10950 | ,000 | ,9316 | 1,4675 |
| 2,00 | ,65974* | ,10950 | ,001 | ,3918 | ,9277 |
| Bonferroni | 1,00 | 2,00 | -,53978* | ,10950 | ,008 | -,8998 | -,1798 |
| 3,00 | -1,19952* | ,10950 | ,000 | -1,5595 | -,8395 |
| 2,00 | 1,00 | ,53978* | ,10950 | ,008 | ,1798 | ,8998 |
| 3,00 | -,65974* | ,10950 | ,003 | -1,0197 | -,2998 |
| 3,00 | 1,00 | 1,19952* | ,10950 | ,000 | ,8395 | 1,5595 |
| 2,00 | ,65974* | ,10950 | ,003 | ,2998 | 1,0197 |
| *. The mean difference is significant at the 0.05 level.TR: Packaging treatment, 1:LDPE, 2:LDPE-AC, 3:LDPE-AC-TO | | | | | | | | |

**Table S6.** Pearson’s correlation of heme iron with TBARS values of pork meat during storage within each packaging treatments

| **Correlations** | | | | | | | | |
| --- | --- | --- | --- | --- | --- | --- | --- | --- |
|  | | DAY0 | DAY2 | DAY4 | DAY6 | DAY8 | DAY10 | DAY12 |
| DAY0 | Pearson Correlation | 1 | ,346 | ,326 | ,275 | ,198 | ,103 | -,269 |
| Sig. (2-tailed) |  | ,160 | ,187 | ,269 | ,432 | ,685 | ,281 |
| N | 18 | 18 | 18 | 18 | 18 | 18 | 18 |
| DAY2 | Pearson Correlation | ,346 | 1 | ,998** | ,989** | ,969** | ,903** | ,719** |
| Sig. (2-tailed) | ,160 |  | ,000 | ,000 | ,000 | ,000 | ,001 |
| N | 18 | 18 | 18 | 18 | 18 | 18 | 18 |
| DAY4 | Pearson Correlation | ,326 | ,998** | 1 | ,995** | ,980** | ,923** | ,749** |
| Sig. (2-tailed) | ,187 | ,000 |  | ,000 | ,000 | ,000 | ,000 |
| N | 18 | 18 | 18 | 18 | 18 | 18 | 18 |
| DAY6 | Pearson Correlation | ,275 | ,989** | ,995** | 1 | ,991** | ,954** | ,794** |
| Sig. (2-tailed) | ,269 | ,000 | ,000 |  | ,000 | ,000 | ,000 |
| N | 18 | 18 | 18 | 18 | 18 | 18 | 18 |
| DAY8 | Pearson Correlation | ,198 | ,969** | ,980** | ,991** | 1 | ,973** | ,846** |
| Sig. (2-tailed) | ,432 | ,000 | ,000 | ,000 |  | ,000 | ,000 |
| N | 18 | 18 | 18 | 18 | 18 | 18 | 18 |
| DAY10 | Pearson Correlation | ,103 | ,903** | ,923** | ,954** | ,973** | 1 | ,902** |
| Sig. (2-tailed) | ,685 | ,000 | ,000 | ,000 | ,000 |  | ,000 |
| N | 18 | 18 | 18 | 18 | 18 | 18 | 18 |
| DAY12 | Pearson Correlation | -,269 | ,719** | ,749** | ,794** | ,846** | ,902** | 1 |
| Sig. (2-tailed) | ,281 | ,001 | ,000 | ,000 | ,000 | ,000 |  |
| N | 18 | 18 | 18 | 18 | 18 | 18 | 18 |
| **. Correlation is significant at the 0.01 level (2-tailed). | | | | | | | | |

**Table S7.** ANOVA Results of TVC.

| **ANOVA** | | | | | | | | |
| --- | --- | --- | --- | --- | --- | --- | --- | --- |
|  | | | | Sum of Squares | df | Mean Square | F | Sig. |
| DAY0 | Between Groups | (Combined) | | ,000 | 2 | ,000 | ,000 | 1,000 |
| Linear Term | Contrast | ,000 | 1 | ,000 | ,000 | 1,000 |
| Deviation | ,000 | 1 | ,000 | ,000 | 1,000 |
| Within Groups | | | ,022 | 6 | ,004 |  |  |
| Total | | | ,022 | 8 |  |  |  |
| DAY2 | Between Groups | (Combined) | | ,742 | 2 | ,371 | 8,914 | ,016 |
| Linear Term | Contrast | ,735 | 1 | ,735 | 17,654 | ,006 |
| Deviation | ,007 | 1 | ,007 | ,173 | ,692 |
| Within Groups | | | ,250 | 6 | ,042 |  |  |
| Total | | | ,992 | 8 |  |  |  |
| DAY4 | Between Groups | (Combined) | | 2,251 | 2 | 1,126 | 35,032 | ,000 |
| Linear Term | Contrast | 1,882 | 1 | 1,882 | 58,556 | ,000 |
| Deviation | ,370 | 1 | ,370 | 11,508 | ,015 |
| Within Groups | | | ,193 | 6 | ,032 |  |  |
| Total | | | 2,444 | 8 |  |  |  |
| DAY6 | Between Groups | (Combined) | | 2,382 | 2 | 1,191 | 11,935 | ,008 |
| Linear Term | Contrast | 2,196 | 1 | 2,196 | 22,006 | ,003 |
| Deviation | ,186 | 1 | ,186 | 1,864 | ,221 |
| Within Groups | | | ,599 | 6 | ,100 |  |  |
| Total | | | 2,981 | 8 |  |  |  |
| DAY8 | Between Groups | (Combined) | | 1,680 | 2 | ,840 | 28,478 | ,001 |
| Linear Term | Contrast | 1,622 | 1 | 1,622 | 54,997 | ,000 |
| Deviation | ,058 | 1 | ,058 | 1,959 | ,211 |
| Within Groups | | | ,177 | 6 | ,030 |  |  |
| Total | | | 1,857 | 8 |  |  |  |

** 1 = LDPE, 2 = LDPE-AC, 3 = LDPE-AC-TO.

| **Table S8** Multiple Comparisons tests.  Multiple Comparisons | | | | | | | | |
| --- | --- | --- | --- | --- | --- | --- | --- | --- |
| Dependent Variable | | (I) TO | (J) TO | Mean Difference (I-J) | Std. Error | Sig. | 95% Confidence Interval | |
| Lower Bound | Upper Bound |
| DAY0 | Tukey HSD | 1,00 | 2,00 | ,00000 | ,04899 | 1,000 | -,1503 | ,1503 |
| 3,00 | ,00000 | ,04899 | 1,000 | -,1503 | ,1503 |
| 2,00 | 1,00 | ,00000 | ,04899 | 1,000 | -,1503 | ,1503 |
| 3,00 | ,00000 | ,04899 | 1,000 | -,1503 | ,1503 |
| 3,00 | 1,00 | ,00000 | ,04899 | 1,000 | -,1503 | ,1503 |
| 2,00 | ,00000 | ,04899 | 1,000 | -,1503 | ,1503 |
| LSD | 1,00 | 2,00 | ,00000 | ,04899 | 1,000 | -,1199 | ,1199 |
| 3,00 | ,00000 | ,04899 | 1,000 | -,1199 | ,1199 |
| 2,00 | 1,00 | ,00000 | ,04899 | 1,000 | -,1199 | ,1199 |
| 3,00 | ,00000 | ,04899 | 1,000 | -,1199 | ,1199 |
| 3,00 | 1,00 | ,00000 | ,04899 | 1,000 | -,1199 | ,1199 |
| 2,00 | ,00000 | ,04899 | 1,000 | -,1199 | ,1199 |
| Bonferroni | 1,00 | 2,00 | ,00000 | ,04899 | 1,000 | -,1611 | ,1611 |
| 3,00 | ,00000 | ,04899 | 1,000 | -,1611 | ,1611 |
| 2,00 | 1,00 | ,00000 | ,04899 | 1,000 | -,1611 | ,1611 |
| 3,00 | ,00000 | ,04899 | 1,000 | -,1611 | ,1611 |
| 3,00 | 1,00 | ,00000 | ,04899 | 1,000 | -,1611 | ,1611 |
| 2,00 | ,00000 | ,04899 | 1,000 | -,1611 | ,1611 |
| DAY2 | Tukey HSD | 1,00 | 2,00 | ,41000 | ,16660 | ,107 | -,1012 | ,9212 |
| 3,00 | ,70000* | ,16660 | ,013 | ,1888 | 1,2112 |
| 2,00 | 1,00 | -,41000 | ,16660 | ,107 | -,9212 | ,1012 |
| 3,00 | ,29000 | ,16660 | ,267 | -,2212 | ,8012 |
| 3,00 | 1,00 | -,70000* | ,16660 | ,013 | -1,2112 | -,1888 |
| 2,00 | -,29000 | ,16660 | ,267 | -,8012 | ,2212 |
| LSD | 1,00 | 2,00 | ,41000* | ,16660 | ,049 | ,0023 | ,8177 |
| 3,00 | ,70000* | ,16660 | ,006 | ,2923 | 1,1077 |
| 2,00 | 1,00 | -,41000* | ,16660 | ,049 | -,8177 | -,0023 |
| 3,00 | ,29000 | ,16660 | ,132 | -,1177 | ,6977 |
| 3,00 | 1,00 | -,70000* | ,16660 | ,006 | -1,1077 | -,2923 |
| 2,00 | -,29000 | ,16660 | ,132 | -,6977 | ,1177 |
| Bonferroni | 1,00 | 2,00 | ,41000 | ,16660 | ,147 | -,1377 | ,9577 |
| 3,00 | ,70000* | ,16660 | ,017 | ,1523 | 1,2477 |
| 2,00 | 1,00 | -,41000 | ,16660 | ,147 | -,9577 | ,1377 |
| 3,00 | ,29000 | ,16660 | ,397 | -,2577 | ,8377 |
| 3,00 | 1,00 | -,70000* | ,16660 | ,017 | -1,2477 | -,1523 |
| 2,00 | -,29000 | ,16660 | ,397 | -,8377 | ,2577 |
| DAY4 | Tukey HSD | 1,00 | 2,00 | ,13000 | ,14636 | ,667 | -,3191 | ,5791 |
| 3,00 | 1,12000* | ,14636 | ,001 | ,6709 | 1,5691 |
| 2,00 | 1,00 | -,13000 | ,14636 | ,667 | -,5791 | ,3191 |
| 3,00 | ,99000* | ,14636 | ,001 | ,5409 | 1,4391 |
| 3,00 | 1,00 | -1,12000* | ,14636 | ,001 | -1,5691 | -,6709 |
| 2,00 | -,99000* | ,14636 | ,001 | -1,4391 | -,5409 |
| LSD | 1,00 | 2,00 | ,13000 | ,14636 | ,409 | -,2281 | ,4881 |
| 3,00 | 1,12000* | ,14636 | ,000 | ,7619 | 1,4781 |
| 2,00 | 1,00 | -,13000 | ,14636 | ,409 | -,4881 | ,2281 |
| 3,00 | ,99000* | ,14636 | ,001 | ,6319 | 1,3481 |
| 3,00 | 1,00 | -1,12000* | ,14636 | ,000 | -1,4781 | -,7619 |
| 2,00 | -,99000* | ,14636 | ,001 | -1,3481 | -,6319 |
| Bonferroni | 1,00 | 2,00 | ,13000 | ,14636 | 1,000 | -,3512 | ,6112 |
| 3,00 | 1,12000* | ,14636 | ,001 | ,6388 | 1,6012 |
| 2,00 | 1,00 | -,13000 | ,14636 | 1,000 | -,6112 | ,3512 |
| 3,00 | ,99000* | ,14636 | ,002 | ,5088 | 1,4712 |
| 3,00 | 1,00 | -1,12000* | ,14636 | ,001 | -1,6012 | -,6388 |
| 2,00 | -,99000* | ,14636 | ,002 | -1,4712 | -,5088 |
| DAY6 | Tukey HSD | 1,00 | 2,00 | ,30000 | ,25794 | ,515 | -,4914 | 1,0914 |
| 3,00 | 1,21000* | ,25794 | ,008 | ,4186 | 2,0014 |
| 2,00 | 1,00 | -,30000 | ,25794 | ,515 | -1,0914 | ,4914 |
| 3,00 | ,91000* | ,25794 | ,029 | ,1186 | 1,7014 |
| 3,00 | 1,00 | -1,21000* | ,25794 | ,008 | -2,0014 | -,4186 |
| 2,00 | -,91000* | ,25794 | ,029 | -1,7014 | -,1186 |
| LSD | 1,00 | 2,00 | ,30000 | ,25794 | ,289 | -,3312 | ,9312 |
| 3,00 | 1,21000* | ,25794 | ,003 | ,5788 | 1,8412 |
| 2,00 | 1,00 | -,30000 | ,25794 | ,289 | -,9312 | ,3312 |
| 3,00 | ,91000* | ,25794 | ,012 | ,2788 | 1,5412 |
| 3,00 | 1,00 | -1,21000* | ,25794 | ,003 | -1,8412 | -,5788 |
| 2,00 | -,91000* | ,25794 | ,012 | -1,5412 | -,2788 |
| Bonferroni | 1,00 | 2,00 | ,30000 | ,25794 | ,867 | -,5480 | 1,1480 |
| 3,00 | 1,21000* | ,25794 | ,010 | ,3620 | 2,0580 |
| 2,00 | 1,00 | -,30000 | ,25794 | ,867 | -1,1480 | ,5480 |
| 3,00 | ,91000* | ,25794 | ,037 | ,0620 | 1,7580 |
| 3,00 | 1,00 | -1,21000* | ,25794 | ,010 | -2,0580 | -,3620 |
| 2,00 | -,91000* | ,25794 | ,037 | -1,7580 | -,0620 |
| DAY8 | Tukey HSD | 1,00 | 2,00 | ,35000 | ,14024 | ,103 | -,0803 | ,7803 |
| 3,00 | 1,04000* | ,14024 | ,001 | ,6097 | 1,4703 |
| 2,00 | 1,00 | -,35000 | ,14024 | ,103 | -,7803 | ,0803 |
| 3,00 | ,69000* | ,14024 | ,006 | ,2597 | 1,1203 |
| 3,00 | 1,00 | -1,04000* | ,14024 | ,001 | -1,4703 | -,6097 |
| 2,00 | -,69000* | ,14024 | ,006 | -1,1203 | -,2597 |
| LSD | 1,00 | 2,00 | ,35000* | ,14024 | ,047 | ,0069 | ,6931 |
| 3,00 | 1,04000* | ,14024 | ,000 | ,6969 | 1,3831 |
| 2,00 | 1,00 | -,35000* | ,14024 | ,047 | -,6931 | -,0069 |
| 3,00 | ,69000* | ,14024 | ,003 | ,3469 | 1,0331 |
| 3,00 | 1,00 | -1,04000* | ,14024 | ,000 | -1,3831 | -,6969 |
| 2,00 | -,69000* | ,14024 | ,003 | -1,0331 | -,3469 |
| Bonferroni | 1,00 | 2,00 | ,35000 | ,14024 | ,140 | -,1110 | ,8110 |
| 3,00 | 1,04000* | ,14024 | ,001 | ,5790 | 1,5010 |
| 2,00 | 1,00 | -,35000 | ,14024 | ,140 | -,8110 | ,1110 |
| 3,00 | ,69000* | ,14024 | ,008 | ,2290 | 1,1510 |
| 3,00 | 1,00 | -1,04000* | ,14024 | ,001 | -1,5010 | -,5790 |
| 2,00 | -,69000* | ,14024 | ,008 | -1,1510 | -,2290 |
| *. The mean difference is significant at the 0.05 level. ** 1 = LDPE, 2 = LDPE-AC, 3 = LDPE-AC-TO. | | | | | | | | |
